# Supplementary material
Source: PubMed Central journal article supplement (PMC9040158)
Supplement: mmc4.pdf [file mmc4.pdf]

**Supplementary Table 1D: The CIP2A interactome detected with individual antibodies specific to CIP2A protein region that is against residues surrounding valine 343 (monoclonal, Ab1), and 618-905 peptide (polyclonal, Ab2)**

**Unique proteins detected with CIP2A antibody 1 (Ab1, residues surrounding valine 343, monoclonal).**

The most abundant of these are AIM1, IRF9, DCP1B, PCMT1 & KIF4A

| Unique peptides | Sequence coverage [%] | Mol. weight [kDa] | Score  | Intensity | MS/MS count | Majority protein IDs | Protein names                                           | Gene names | elut_CST  | elut_CST  | elut_HM | elut_HM |
|-----------------|-----------------------|-------------------|--------|-----------|-------------|----------------------|---------------------------------------------------------|------------|-----------|-----------|---------|---------|
| 22              | 17.6                  | 188.67            | 203.54 | 590990000 | 70          | Q9Y4K1               | Absent in melanoma 1 protein                            | AIM1       | 88326316  | 96191761  | 0       | 0       |
| 10              | 41                    | 43.696            | 114.36 | 845950000 | 50          | Q00978               | Interferon regulatory factor 9                          | IRF9       | 137229937 | 124880242 | 0       | 0       |
| 13              | 29.2                  | 67.722            | 113.15 | 447990000 | 38          | Q8IZD4               | mRNA-decapping enzyme 1B                                | DCP1B      | 70125217  | 72609249  | 0       | 0       |
| 7               | 36.1                  | 24.636            | 58.508 | 326180000 | 27          | P22061               | Protein-L-isoaspartate(D-aspartate) O-methyltransferase | PCMT1      | 47709062  | 37044089  | 0       | 0       |
| 9               | 8.8                   | 139.88            | 64.029 | 98156000  | 24          | O95239               | Chromosome-associated kinesin KIF4A                     | KIF4A      | 20049042  | 11688043  | 0       | 0       |
| 5               | 5.1                   | 136.06            | 36.354 | 85411000  | 12          | P55265               | Double-stranded RNA-specific adenosine deaminase        | ADAR       | 14201008  | 10328017  | 0       | 0       |
| 4               | 2.6                   | 208.73            | 30.353 | 44484000  | 7           | P51610               | Host cell factor 1                                      | HCFC1      | 6972381.1 | 6321607.4 | 0       | 0       |
| 3               | 3.6                   | 96.263            | 20.179 | 17134000  | 7           | Q8N0Z3               | Spindle and centriole-associated protein 1              | SPICE1     | 1724695.2 | 1473004.1 | 0       | 0       |
| 2               | 17.3                  | 15.179            | 14.186 | 69626000  | 6           | O15116               | U6 snRNA-associated Sm-like protein LSM1                | LSM1       | 9820669.8 | 6383693.7 | 0       | 0       |
| 5               | 5.5                   | 117.31            | 29.018 | 46141000  | 5           | O75808               | Calpain-15                                              | CAPN15     | 7474781.6 | 6685388.6 | 0       | 0       |
| 3               | 29.6                  | 14.585            | 29.641 | 208460000 | 5           | Q9Y3B4               | Splicing factor 3B subunit 6                            | SF3B6      | 20098995  | 21032981  | 0       | 0       |

|   |     |        |        |           |   |        |                                            |         |           |           |   |   |
|---|-----|--------|--------|-----------|---|--------|--------------------------------------------|---------|-----------|-----------|---|---|
| 3 | 6.3 | 58.449 | 20.462 | 80656000  | 4 | O43172 | U4/U6 small nuclear ribonucleoprotein Prp4 | PRPF4   | 7470379   | 5443714.6 | 0 | 0 |
| 2 | 9.4 | 33.325 | 13.823 | 48560000  | 4 | Q04323 | UBX domain-containing protein 1            | UBXN1   | 7919017.4 | 7433292.8 | 0 | 0 |
| 2 | 2.5 | 87.339 | 11.709 | 6309900   | 4 | Q9ULG6 | Cell cycle progression protein 1           | CCPG1   | 914301.21 | 1191295.6 | 0 | 0 |
| 2 | 0.8 | 350.93 | 11.855 | 18812000  | 3 | Q5VT06 | Centrosome-associated protein 350          | CEP350  | 3599113.1 | 2308605.1 | 0 | 0 |
| 2 | 3.8 | 48.457 | 10.909 | 18348000  | 3 | Q8IU60 | m7GpppN-mRNA hydrolase                     | DCP2    | 2818605.2 | 2234204.8 | 0 | 0 |
| 3 | 5.9 | 57.368 | 24.265 | 31898000  | 2 | Q9Y6R9 | Coiled-coil domain-containing protein 61   | CCDC61  | 4939693.2 | 4437205.7 | 0 | 0 |
| 2 | 1   | 216.85 | 11.22  | 106610000 | 2 | Q8TF72 | Protein Shroom3                            | SHROOM3 | 15420006  | 14135994  | 0 | 0 |

**Unique proteins detected with CIP2A antibody 2 (Ab2, 618-905 peptide; polyclonal):**

**In terms of detection intensity and frequency, PPFIA1, FAF1, NFAT5, NAB1, KCTD10, TMEM43 & ACSL3 are strongest**

| Unique peptides | Sequence coverage [%] | Mol. weight [kDa] | Score  | Intensity | MS/MS count | Majority protein IDs | Protein names           | Gene names | Elute CST | Elute CST | Elute HM | Elute HM |
|-----------------|-----------------------|-------------------|--------|-----------|-------------|----------------------|-------------------------|------------|-----------|-----------|----------|----------|
| 8               | 17.1                  | 69.366            | 101.78 | 1.399E+10 | 95          | P02768-1; P02768     | Serum albumin           | ALB        | 0         | 0         | 1.5E+09  | 1.6E+09  |
| 19              | 27.1                  | 135.78            | 252.52 | 805540000 | 77          | Q13136               | Liprin-alpha-1          | PPFIA1     | 0         | 0         | 1.2E+08  | 8.7E+07  |
| 15              | 24.6                  | 73.953            | 188.12 | 650210000 | 61          | Q9UNN5               | FAS-associated factor 1 | FAF1       | 0         | 0         | 9.2E+07  | 7.1E+07  |

|    |      |            |            |                |    |               |                                                                                          |         |   |   |             |             |
|----|------|------------|------------|----------------|----|---------------|------------------------------------------------------------------------------------------|---------|---|---|-------------|-------------|
| 17 | 18.5 | 165.7<br>6 | 157.3<br>6 | 825200000      | 56 | O94916        | Nuclear factor of<br>activated T-cells 5                                                 | NFAT5   | 0 | 0 | 8E+07       | 9.7E+0<br>7 |
| 11 | 27.3 | 54.40<br>1 | 166.0<br>8 | 378700000      | 46 | Q13506        | NGFI-A-binding protein<br>1                                                              | NAB1    | 0 | 0 | 4.9E+0<br>7 | 3E+07       |
| 6  | 37.4 | 15.99<br>8 | 60.88      | 318480000<br>0 | 41 | P68871;P02042 | Hemoglobin subunit<br>beta                                                               | HBB;HBD | 0 | 0 | 3.1E+0<br>8 | 3.4E+0<br>8 |
| 8  | 7    | 192.7<br>8 | 204.2<br>5 | 915340000      | 39 | P0C0L4;P0C0L5 | Complement C4-A;                                                                         | C4A;C4B | 0 | 0 | 1.2E+0<br>8 | 9.9E+0<br>7 |
| 13 | 6.5  | 262.6<br>2 | 116.8<br>5 | 300600000      | 38 | P02751        | Fibronectin;                                                                             | FN1     | 0 | 0 | 3.4E+0<br>7 | 4.1E+0<br>7 |
| 4  | 7.3  | 77.06<br>3 | 41.81<br>8 | 594430000      | 32 | P02787        | Serotransferrin                                                                          | TF      | 0 | 0 | 7.9E+0<br>7 | 4.7E+0<br>7 |
| 4  | 29.7 | 35.43<br>2 | 56.19<br>6 | 236970000      | 25 | Q9H3F6        | BTB/POZ domain-<br>containing adapter for<br>CUL3-mediated RhoA<br>degradation protein 3 | KCTD10  | 0 | 0 | 3.2E+0<br>7 | 2.7E+0<br>7 |
| 6  | 20.2 | 44.87<br>5 | 65.29<br>9 | 236730000      | 24 | Q9BTV4        | Transmembrane protein<br>43                                                              | TMEM43  | 0 | 0 | 3E+07       | 2.7E+0<br>7 |
| 3  | 3.2  | 59.57<br>8 | 20.05<br>7 | 334920000<br>0 | 21 | P04196        | Histidine-rich<br>glycoprotein                                                           | HRG     | 0 | 0 | 4.3E+0<br>8 | 4E+08       |
| 6  | 13.9 | 80.41<br>9 | 72.77<br>9 | 309920000      | 20 | O95573        | Long-chain-fatty-acid--<br>CoA ligase 3                                                  | ACSL3   | 0 | 0 | 3.6E+0<br>7 | 2.9E+0<br>7 |
| 3  | 4.1  | 51.67<br>6 | 31.67      | 297030000      | 17 | P02790        | Hemopexin                                                                                | HPX     | 0 | 0 | 3.5E+0<br>7 | 4E+07       |
| 7  | 33.8 | 64.43<br>6 | 74.27<br>2 | 182660000      | 16 | Q9H0L4        | Cleavage stimulation<br>factor subunit 2 tau<br>variant                                  | CSTF2T  | 0 | 0 | 2.8E+0<br>7 | 1.4E+0<br>7 |

|   |      |            |            |           |    |               |                                                      |         |   |   |             |             |
|---|------|------------|------------|-----------|----|---------------|------------------------------------------------------|---------|---|---|-------------|-------------|
| 4 | 16.1 | 37.67      | 40.97<br>2 | 209900000 | 14 | Q96PU8        | Protein quaking                                      | QKI     | 0 | 0 | 2.8E+0<br>7 | 2.3E+0<br>7 |
| 4 | 6.6  | 101.1<br>1 | 53.01<br>1 | 140610000 | 13 | P56192        | Methionine--tRNA ligase,<br>cytoplasmic              | MARS    | 0 | 0 | 1.3E+0<br>7 | 1.1E+0<br>7 |
| 4 | 21.3 | 29.80<br>4 | 36.09<br>2 | 96256000  | 12 | P35232        | Prohibitin                                           | PHB     | 0 | 0 | 965449<br>9 | 1E+07       |
| 3 | 2.9  | 163.2<br>9 | 35.69<br>9 | 382900000 | 12 | P01023;P20742 | Alpha-2-<br>macroglobulin;Pregnanc<br>y zone protein | A2M;PZP | 0 | 0 | 4.4E+0<br>7 | 5E+07       |
| 2 | 4.1  | 187.1<br>5 | 42.95<br>3 | 141040000 | 12 | P01024        | Complement C3;                                       | C3      | 0 | 0 | 1.8E+0<br>7 | 1.5E+0<br>7 |
| 6 | 9.9  | 80.59<br>2 | 51.16<br>7 | 82675000  | 11 | P49959        | Double-strand break<br>repair protein MRE11A         | MRE11A  | 0 | 0 | 894041<br>3 | 945371<br>5 |
| 4 | 3.6  | 129.3<br>9 | 25.59<br>4 | 110650000 | 10 | Q28194;P07996 | Thrombospondin-1                                     | THBS1   | 0 | 0 | 1.3E+0<br>7 | 1.3E+0<br>7 |
| 2 | 6.3  | 35.97<br>9 | 22.78<br>2 | 83199000  | 9  | Q03247;P02649 | Apolipoprotein E                                     | APOE    | 0 | 0 | 932731<br>2 | 1E+07       |
| 4 | 9.8  | 51.11      | 30.68<br>9 | 65583000  | 8  | P01730        | T-cell surface<br>glycoprotein CD4                   | CD4     | 0 | 0 | 741302<br>0 | 806867<br>3 |
| 4 | 8.9  | 80.31      | 34.62<br>6 | 85584000  | 8  | Q9UH99        | SUN domain-containing<br>protein 2                   | SUN2    | 0 | 0 | 949930<br>1 | 826841<br>9 |
| 2 | 13.8 | 22.95<br>8 | 14.01<br>5 | 43155000  | 8  | O15258        | Protein RER1                                         | RER1    | 0 | 0 | 465858<br>4 | 583398<br>4 |
| 2 | 2.5  | 228.8<br>6 | 13.17<br>6 | 100010000 | 8  | P48634        | Protein PRRC2A                                       | PRRC2A  | 0 | 0 | 1E+07       | 1.1E+0<br>7 |
| 2 | 2.8  | 101.1<br>9 | 14.43<br>1 | 65157000  | 8  | Q9BZF1        | Oxysterol-binding<br>protein-related protein 8       | OSBPL8  | 0 | 0 | 521010<br>1 | 456780<br>6 |

|   |      |            |            |           |   |        |                                              |         |   |   |             |             |
|---|------|------------|------------|-----------|---|--------|----------------------------------------------|---------|---|---|-------------|-------------|
| 2 | 15.6 | 17.20<br>1 | 14.37<br>2 | 122410000 | 8 | Q9HBL7 | Plasminogen receptor (KT)                    | PLGRKT  | 0 | 0 | 1.7E+0<br>7 | 1.4E+0<br>7 |
| 2 | 10.4 | 30.39<br>4 | 15.00<br>4 | 65134000  | 7 | O15260 | Surfeit locus protein 4                      | SURF4   | 0 | 0 | 974263<br>1 | 363771<br>2 |
| 2 | 5.1  | 39.73<br>1 | 15.13<br>8 | 152360000 | 7 | P27169 | Serum paraoxonase/arylesterase 1             | PON1    | 0 | 0 | 1.6E+0<br>7 | 2.2E+0<br>7 |
| 2 | 10.7 | 24.95      | 51.87<br>1 | 29685000  | 7 | Q9H444 | Charged multivesicular body protein 4b       | CHMP4B  | 0 | 0 | 368821<br>2 | 305620<br>5 |
| 3 | 10.7 | 47.13<br>7 | 23.75<br>9 | 66993000  | 6 | Q53H12 | Acylglycerol kinase, mitochondrial           | AGK     | 0 | 0 | 486810<br>9 | 787959<br>5 |
| 3 | 14   | 34.93      | 24.52<br>5 | 171940000 | 6 | Q96AG4 | Leucine-rich repeat-containing protein 59    | LRRRC59 | 0 | 0 | 1.4E+0<br>7 | 1.4E+0<br>7 |
| 2 | 0.9  | 209.3<br>1 | 11.09<br>1 | 76298000  | 6 | Q2WGJ9 | Fer-1-like protein 6                         | FER1L6  | 0 | 0 | 986153<br>0 | 606089<br>7 |
| 2 | 11.3 | 22.48<br>7 | 20.50<br>2 | 67158000  | 6 | Q92522 | Histone H1x                                  | H1FX    | 0 | 0 | 545792<br>1 | 485809<br>7 |
| 4 | 5.9  | 90.98      | 29.49<br>9 | 55678000  | 5 | P25205 | DNA replication licensing factor MCM3        | MCM3    | 0 | 0 | 422189<br>7 | 530929<br>9 |
| 4 | 29.3 | 23.86<br>5 | 27.99<br>7 | 116690000 | 5 | Q8WUY1 | Protein THEM6                                | THEM6   | 0 | 0 | 1.7E+0<br>7 | 1.4E+0<br>7 |
| 4 | 8.7  | 69.18<br>7 | 27.47      | 29401000  | 5 | Q96Q07 | BTB/POZ domain-containing protein 9          | BTBD9   | 0 | 0 | 451908<br>7 | 280179<br>5 |
| 3 | 10.3 | 39.49<br>9 | 19.32<br>4 | 53963000  | 5 | Q9BPY3 | Protein FAM118B                              | FAM118B | 0 | 0 | 985599<br>4 | 411291<br>5 |
| 2 | 0.7  | 165.3<br>9 | 11.03<br>9 | 178590000 | 5 | O94823 | Probable phospholipid-transporting ATPase VB | ATP10B  | 0 | 0 | 1.3E+0<br>7 | 1.7E+0<br>7 |

|   |      |            |            |                |   |                          |                                                                                        |                       |   |   |             |             |
|---|------|------------|------------|----------------|---|--------------------------|----------------------------------------------------------------------------------------|-----------------------|---|---|-------------|-------------|
| 2 | 2.5  | 90.56<br>8 | 14.05<br>1 | 52480000       | 5 | P00747                   | Plasminogen;                                                                           | PLG                   | 0 | 0 | 768732<br>4 | 538800<br>6 |
| 2 | 10.7 | 16.76<br>2 | 10.80<br>3 | 45777000       | 5 | P20674                   | Cytochrome c oxidase subunit 5A, mitochondrial                                         | COX5A                 | 0 | 0 | 432110<br>8 | 441190<br>4 |
| 2 | 2.5  | 95.92<br>5 | 15.08<br>1 | 22133000       | 5 | Q8NE71                   | ATP-binding cassette sub-family F member 1                                             | ABCF1                 | 0 | 0 | 193400<br>5 | 165629<br>7 |
| 4 | 9.3  | 54.57<br>7 | 30.62<br>4 | 56321000       | 4 | P06127                   | T-cell surface glycoprotein CD5                                                        | CD5                   | 0 | 0 | 440399<br>1 | 510341<br>0 |
| 3 | 7    | 80.87<br>4 | 36.98      | 44556000       | 4 | Q9Y2L9                   | Leucine-rich repeat and calponin homology domain-containing protein 1                  | LRCH1                 | 0 | 0 | 287679<br>3 | 465361<br>4 |
| 2 | 2    | 233.5<br>1 | 31.73<br>7 | 35166000       | 4 | O15027                   | Protein transport protein Sec16A                                                       | SEC16A                | 0 | 0 | 418649<br>1 | 369099<br>9 |
| 2 | 26.7 | 21.30<br>8 | 14.32<br>8 | 104770000      | 4 | P84095                   | Rho-related GTP-binding protein RhoG                                                   | RHOG                  | 0 | 0 | 926192<br>1 | 940137<br>3 |
| 2 | 4.1  | 46.51<br>3 | 10.87<br>4 | 333330000<br>0 | 4 | Q9Y383;Q9NQ29            | Putative RNA-binding protein Luc7-like 2;Putative RNA-binding protein Luc7-like 1      | LUC7L2;LUC7L          | 0 | 0 | 2.8E+0<br>8 | 2.8E+0<br>8 |
| 4 | 24.4 | 28.80<br>4 | 29.11<br>2 | 82758000       | 3 | P18669;P15259;Q8N0Y<br>7 | Phosphoglycerate mutase 1;Phosphoglycerate mutase 2;Probable phosphoglycerate mutase 4 | PGAM1;PGAM2;PGAM<br>4 | 0 | 0 | 702078<br>1 | 785189<br>8 |
| 2 | 1.9  | 136.3<br>7 | 11.12<br>7 | 31347000       | 3 | Q86VP6                   | Cullin-associated NEDD8-dissociated protein 1                                          | CAND1                 | 0 | 0 | 313549<br>1 | 345570<br>8 |

|   |     |            |            |           |   |               |                                          |               |   |   |             |             |
|---|-----|------------|------------|-----------|---|---------------|------------------------------------------|---------------|---|---|-------------|-------------|
| 2 | 1.1 | 234.7<br>1 | 12.72<br>4 | 9588800   | 3 | Q9NZM1        | Myoferlin                                | MYOF          | 0 | 0 | 164719<br>5 | 941068      |
| 3 | 3.2 | 138.3<br>4 | 17.92<br>2 | 80483000  | 2 | P53621        | Coatomer subunit<br>alpha;Xenin;Proxenin | COPA          | 0 | 0 | 588960<br>7 | 698612<br>0 |
| 3 | 9.6 | 45.62<br>6 | 20.84<br>7 | 53708000  | 2 | P62195        | 26S protease regulatory<br>subunit 8     | PSMC5         | 0 | 0 | 485318<br>4 | 427848<br>9 |
| 2 | 2.8 | 113.0<br>8 | 12.49<br>5 | 122370000 | 2 | P09874        | Poly [ADP-ribose]<br>polymerase 1        | PARP1         | 0 | 0 | 1.3E+0<br>7 | 969896<br>9 |
| 2 | 5.5 | 48.11<br>5 | 16.32<br>2 | 33264000  | 2 | P37268        | Squalene synthase                        | FDFT1         | 0 | 0 | 439539<br>1 | 388900<br>6 |
| 2 | 9.8 | 24.34<br>7 | 12.79<br>5 | 11340000  | 2 | Q9UL25        | Ras-related protein Rab-<br>21           | RAB21         | 0 | 0 | 153680<br>2 | 126279<br>6 |
| 2 | 7.1 | 37.83<br>9 | 11.26<br>3 | 16607000  | 1 | O94905;O75477 | Erlin-2;Erlin-1                          | ERLIN2;ERLIN1 | 0 | 0 | 197629<br>9 | 168410<br>4 |
