# Supplementary material
Source: PubMed Central journal article supplement (PMC9040158)

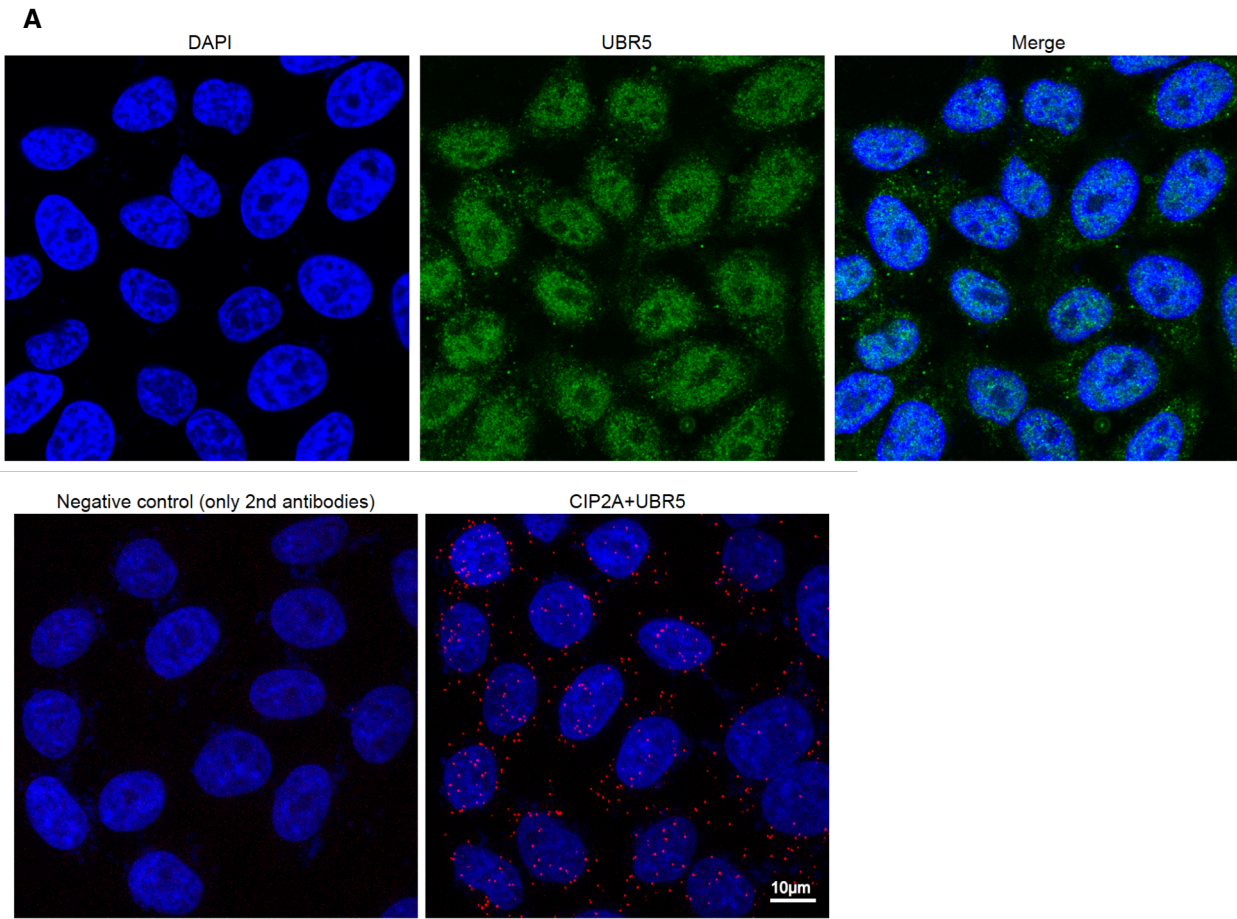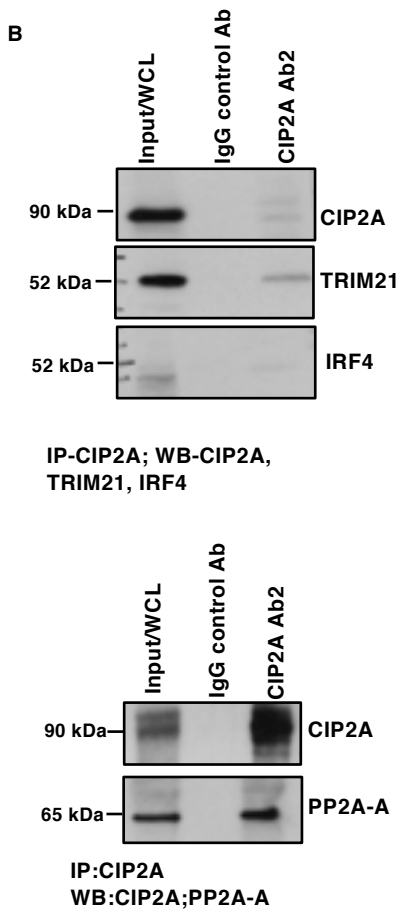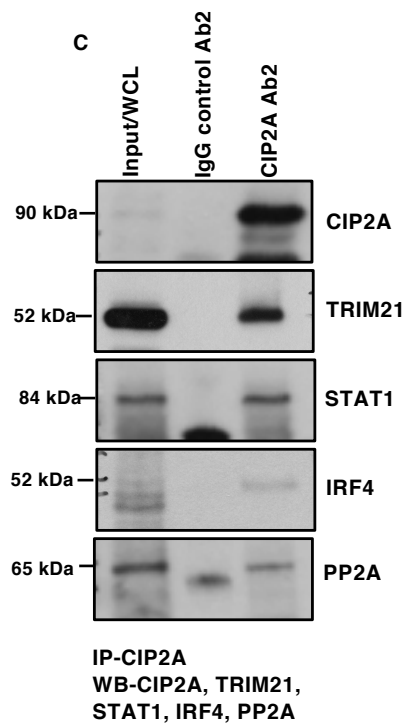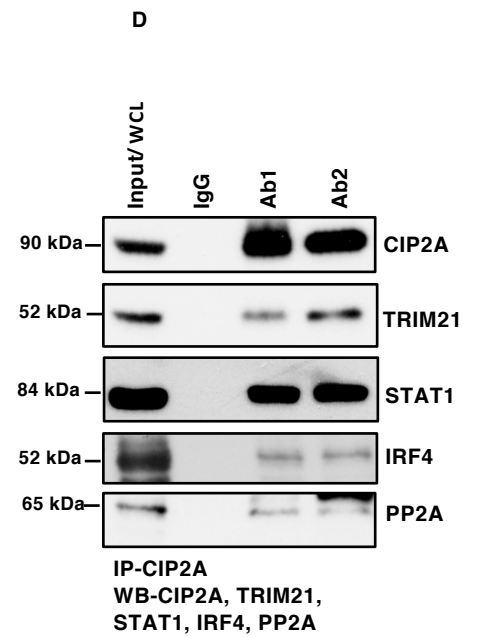

Supplement: mmc12.pdf [file mmc12.pdf]

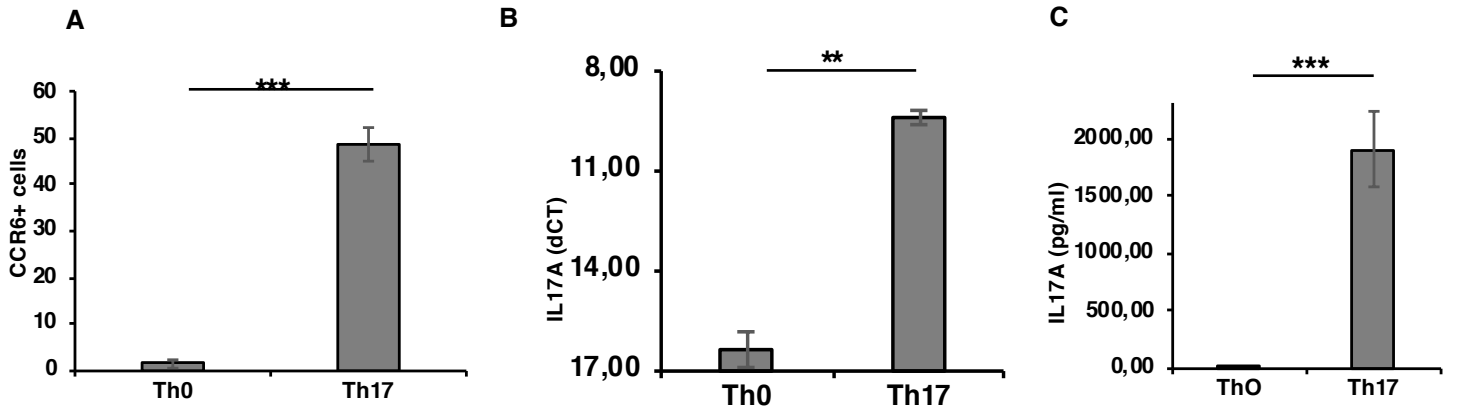

**D**

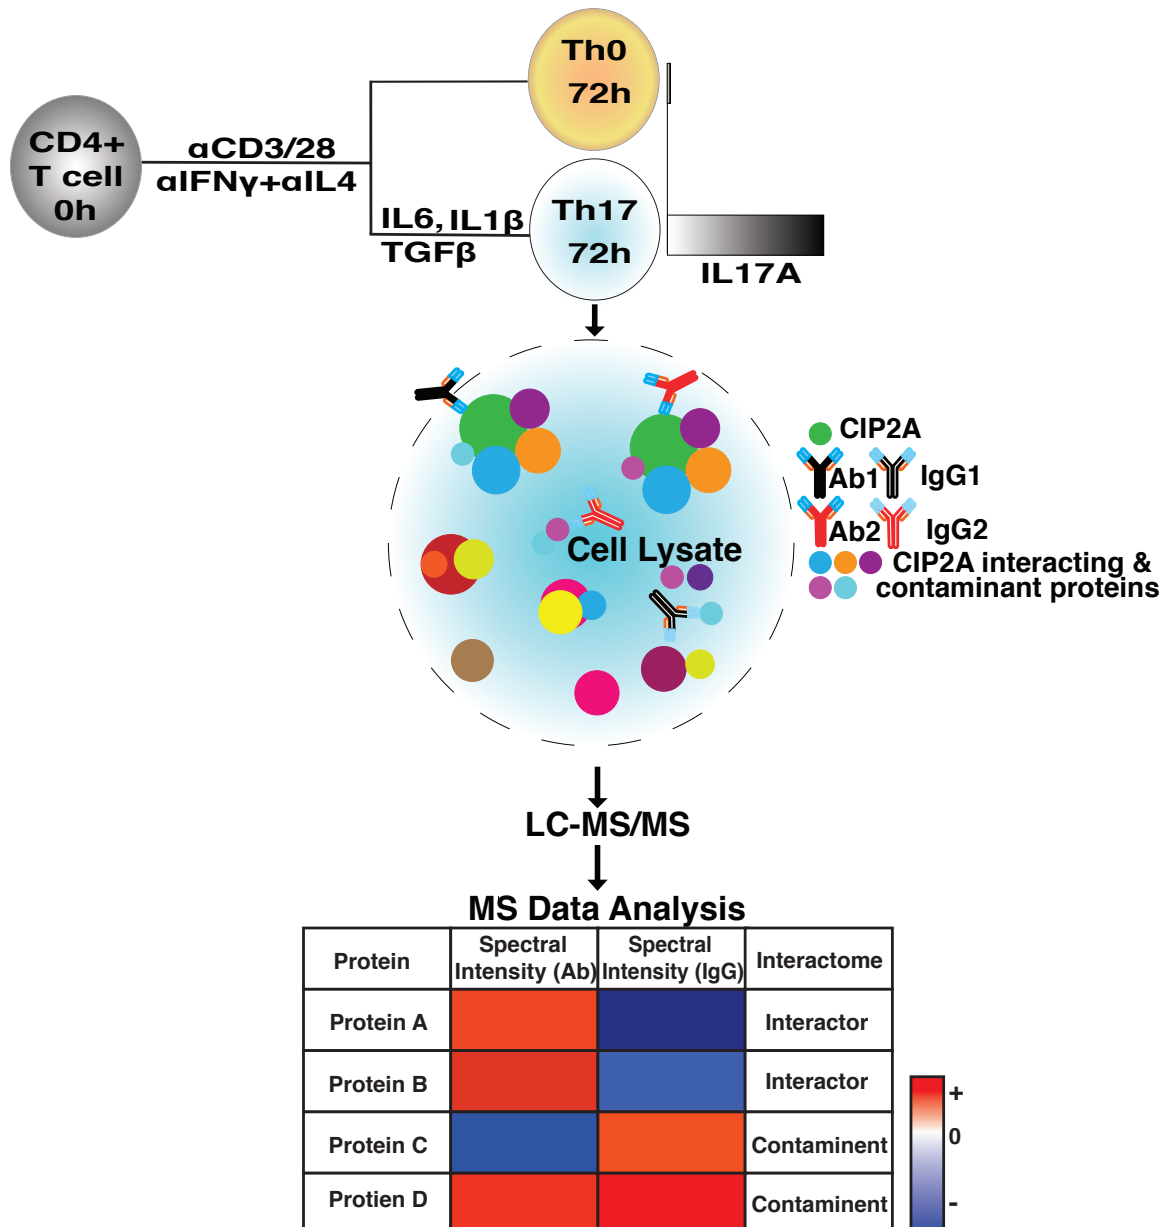

Supplement: mmc9.pdf [file mmc9.pdf]
